# Supplementary material for: Structure and photoluminescence of silver(i) trinuclear halopyrazolato complexes
Source: Royal Society of Chemistry journal article supplement (doi:10.1039/c4dt01978d), 2014-01-01
Supplement: c4dt01978d1.pdf [file c4dt01978d1.pdf]

**Supporting Information for:**

**Structure and photoluminescence of  
silver(I) trinuclear halopyrazolato complexes**

**Yui Morishima<sup>a</sup>, David James Young<sup>b</sup>, Kiyoshi Fujisawa<sup>a\*</sup>**

<sup>a</sup>Department of Chemistry, Ibaraki University, Mito  
310-8512, Japan

<sup>b</sup>School of Science, Monash University, Jalan Lagoon Selatan, 47500 Bandar  
Sunway, Selangor D.E., Malaysia

|                 |                                                                                                              |    |
|-----------------|--------------------------------------------------------------------------------------------------------------|----|
| <b>Table S1</b> | X-ray crystallographic data for <b>L1</b> and <b>L5</b> complexes                                            | S1 |
|                 | Experimental details of <b>[Ag(L1Br)]<sub>2</sub></b> , <b>[Ag(L5H)]<sub>2</sub></b> , and <b>[Ag(L5Br)]</b> | S2 |
| <b>Fig. S1</b>  | IR, far-IR, Raman spectra of <b>L1</b> and <b>L5</b> complexes                                               | S4 |
| <b>Table S2</b> | Emission data at variable temperatures at 280 nm irradiation.                                                | S5 |
| References      |                                                                                                              | S5 |

**Table S1**X-ray crystallographic data for **L1** and **L5** complexes.

|                                                             | [Ag(L1Cl)] <sub>2</sub> · 0.5C <sub>6</sub> H <sub>14</sub> ·<br>3 × 0.25H <sub>2</sub> O           | [Ag(L1I)]                                                                     | [Ag(L1I)] <sub>2</sub> · C <sub>6</sub> H <sub>14</sub>                        | [Ag(L5Cl)] · 2CH <sub>2</sub> Cl <sub>2</sub>                                  |
|-------------------------------------------------------------|-----------------------------------------------------------------------------------------------------|-------------------------------------------------------------------------------|--------------------------------------------------------------------------------|--------------------------------------------------------------------------------|
| Formula                                                     | C <sub>57</sub> H <sub>92.5</sub> Ag <sub>6</sub> Cl <sub>6</sub> N <sub>12</sub> O <sub>0.75</sub> | C <sub>27</sub> H <sub>42</sub> Ag <sub>3</sub> I <sub>3</sub> N <sub>6</sub> | C <sub>60</sub> H <sub>98</sub> Ag <sub>6</sub> I <sub>6</sub> N <sub>12</sub> | C <sub>47</sub> H <sub>34</sub> Ag <sub>3</sub> Cl <sub>7</sub> N <sub>6</sub> |
| Formula weight                                              | 1817.86                                                                                             | 1154.99                                                                       | 2396.15                                                                        | 1254.60                                                                        |
| Crystal system                                              | Monoclinic                                                                                          | Orthorhombic                                                                  | Monoclinic                                                                     | Orthorhombic                                                                   |
| Space group                                                 | <i>P2</i> <sub>1</sub> / <i>c</i> (No. 14)                                                          | <i>Pna</i> 2 <sub>1</sub> (No. 33)                                            | <i>P2</i> <sub>1</sub> / <i>c</i> (No. 14)                                     | <i>Pna</i> 2 <sub>1</sub> (No. 33)                                             |
| <i>a</i> / Å                                                | 10.2520(11)                                                                                         | 11.5188(10)                                                                   | 14.823(2)                                                                      | 9.544(2)                                                                       |
| <i>b</i> / Å                                                | 29.412(2)                                                                                           | 23.8743(13)                                                                   | 12.7462(11)                                                                    | 20.286(4)                                                                      |
| <i>c</i> / Å                                                | 27.446(3)                                                                                           | 14.0966(7)                                                                    | 20.735(3)                                                                      | 24.142(4)                                                                      |
| $\beta$ / °                                                 | 99.3800(11)                                                                                         | ---                                                                           | 90.874(2)                                                                      | ---                                                                            |
| <i>V</i> / Å <sup>3</sup>                                   | 8165.2(12)                                                                                          | 3876.6(5)                                                                     | 3917.1(8)                                                                      | 4674(2)                                                                        |
| <i>Z</i>                                                    | 4                                                                                                   | 4                                                                             | 2                                                                              | 4                                                                              |
| <i>D</i> <sub>calc</sub> / gcm <sup>-3</sup>                | 1.479                                                                                               | 1.979                                                                         | 2.031                                                                          | 1.783                                                                          |
| <i>R</i> (int)                                              | 0.0512                                                                                              | 0.0281                                                                        | 0.0456                                                                         | 0.0780                                                                         |
| $\mu$ (Mo <i>K</i> $\alpha$ ) / cm <sup>-1</sup>            | 16.417                                                                                              | 39.099                                                                        | 38.734                                                                         | 16.821                                                                         |
| Reflections collected                                       | 63254                                                                                               | 30308                                                                         | 28371                                                                          | 37740                                                                          |
| Unique reflections                                          | 18485                                                                                               | 4590                                                                          | 8762                                                                           | 8670                                                                           |
| No. of observations                                         | 7487 ( <i>I</i> > 3 $\sigma$ ( <i>I</i> ))                                                          | 4145 ( <i>I</i> > 3 $\sigma$ ( <i>I</i> ))                                    | 6953 ( <i>I</i> > 3 $\sigma$ ( <i>I</i> ))                                     | 5024 ( <i>I</i> > 2 $\sigma$ ( <i>I</i> ))                                     |
| No. of variables                                            | 823                                                                                                 | 395                                                                           | 428                                                                            | 603                                                                            |
| Reflections/para. ratio                                     | 9.10                                                                                                | 10.49                                                                         | 16.25                                                                          | 8.33                                                                           |
| <i>R</i> ( <i>I</i> > 3 $\sigma$ ( <i>I</i> ))              | 0.0603                                                                                              | 0.0306                                                                        | 0.0517                                                                         | 0.0390( <i>I</i> > 2 $\sigma$ ( <i>I</i> ))                                    |
| <i>R</i> <sub>w</sub> ( <i>I</i> > 3 $\sigma$ ( <i>I</i> )) | 0.1335                                                                                              | 0.0755                                                                        | 0.1282                                                                         | 0.0530 ( <i>I</i> > 2 $\sigma$ ( <i>I</i> ))                                   |
| Good. of fit indicator                                      | 1.854                                                                                               | 1.628                                                                         | 2.546                                                                          | 0.567                                                                          |
| Flack parameter                                             | ---                                                                                                 | 0.25(8)                                                                       |                                                                                | 0.06(3)                                                                        |
|                                                             |                                                                                                     | (Friedel pairs = 3956)                                                        |                                                                                | (Friedel pairs = 3170)                                                         |
| Max/min peak, /e Å <sup>3</sup>                             | 1.68 / -0.69                                                                                        | 0.89 / -0.59                                                                  | 2.51 / -1.73                                                                   | 1.29 / -1.12                                                                   |

$$R = \sum ||F_o| - |F_c|| / \sum |F_o|; R_w = [(\sum w((F_o^2 - F_c^2)^2) / \sum w(F_o^2)^2)]^{1/2}$$

## Experimental section

### Preparation of Complexes

#### $\{[\text{Ag}(\mu\text{-4-Br-3,5-}i\text{Pr}_2\text{pz})]_3\}_2$ ( $[\text{Ag}(\text{L1Br})]_2$ )<sup>1</sup>

This complex was prepared by a procedure analogous to that used for  $[\text{Ag}(\text{L1Cl})]_2$ , substituting  $\text{NaL1Br}$  (742 mg, 2.93 mmol). Colorless crystals (753 mg, 0.371 mmol, yield 76%) were isolated from hexane at  $-15$  °C. Far-IR (CsI,  $\text{cm}^{-1}$ ): 670w, 658w, 646w, 585m, 555m, 545w (C–Br), 505m (Ag–N), 405s, 366s, 344w, 242vs, 211s. Raman (solid,  $\text{cm}^{-1}$ ): 2970vs (C–H, aliphatic), 2910vs (C–H, aliphatic), 2868vs (C–H, aliphatic), 2754w, 2713w, 1499m (C=N), 1486m, 1443s, 1431m, 1367vs, 1303m, 1280m, 1181m, 1145m, 1109m, 1091m, 1045m, 957m, 881s, 708w, 647m, 586w, 533s (C–Br), 506m (Ag–N), 401w, 331w, 239m, 186w (Ag...Ag). UV–Vis (solution, cyclohexane,  $\lambda_{\text{max}}/\text{nm}$  ( $\epsilon/\text{cm}^{-1}\text{mol}^{-1}\text{dm}^3$ )): 227 (38100). UV–Vis (solid, nujol, nm): 227.5. Emission (solid, 299 K,  $\lambda_{\text{max}}/\text{nm}$ ): 312, 379, 620 (ex. 280 nm).

#### $\{[\text{Ag}(\mu\text{-3,5-Ph}_2\text{pz})]_3\}_2$ ( $[\text{Ag}(\text{L5H})]_2$ )<sup>2-3</sup>

A solution of  $\text{NaL5H}$  (688 mg, 2.84 mmol) in tetrahydrofuran ( $20 \text{ cm}^3$ ) was added dropwise to a suspension of silver(I) nitrate (484 mg, 2.85 mmol) in tetrahydrofuran ( $10 \text{ cm}^3$ ) over 15 min. The reaction was protected from light and after stirring for a few days, the solvent was evaporated under vacuum. The resulting solid was extracted with dichloromethane ( $40 \text{ cm}^3$ ) to remove sodium nitrate. The filtrate was concentrated under vacuum to provide a white powder that was recrystallized from dichloromethane at  $-15$  °C. These colorless crystals (615 mg, 0.313 mmol, yield 66%) were filtered and dried under vacuum. IR (KBr,  $\text{cm}^{-1}$ ): 3061m (C–H, aliphatic), 3028m (C–H, aliphatic), 1943w, 1870w, 1799w, 1748w, 1603m, 1573m, 1538w, 1512w, 1496w, 1470vs (C=N), 1425m, 1400s, 1335m, 1322m, 1306m, 1275m, 1220w, 1156m, 1103s, 1071s, 1028m, 1002m, 992m, 978w, 908m, 801m, 752vs, 693vs, 553m, 507w, 437w. Far-IR (CsI,  $\text{cm}^{-1}$ ): 618m, 553vs, 533m, 526w, 508vs (Ag–N), 479m, 450m, 439s, 415m, 405m, 359m, 288m, 233m, 194s, 178ws, 159w, 152w. Raman (solid,  $\text{cm}^{-1}$ ): 3124m (C–H, aromatic), 3061m (C–H, aromatic), 1606vs, 1574w, 1537w, 1516m, 1464w (C=N), 1451w, 1428s, 1413m, 1404m, 1322w, 1296w, 1223w, 1182w, 1158w, 1102w, 1046w, 1030w, 1002s, 963m, 843w, 768w, 697w, 669w, 619w, 510w (Ag–N), 407w, 350w, 276w, 244w (Ag...Ag). <sup>1</sup>H-NMR ( $\text{CDCl}_3$ , 500 MHz):  $\delta$  6.77 (s, 6H, pz-*H*), 7.15 (t,  $J = 7$  Hz, 24H, *m*-Ph), 7.26 (t,  $J = 7$  Hz, 12H,

*p*-Ph), 7.65 (d,  $J = 3.5$  Hz, 24H, *o*-Ph).  $^{13}\text{C}$ -NMR ( $\text{CDCl}_3$ , 125 MHz):  $\delta$  101.7 (*pz-C*<sub>4</sub>), 126.7 (*o*-Ph), 128.2 (*p*-Ph), 129.2 (*m*-Ph), 133.8 (Ph-*C*<sub>1</sub>), 155.5 (*pz-C*<sub>3,5</sub>). UV–Vis (solution,  $\text{CH}_2\text{Cl}_2$ ,  $\lambda_{\text{max}}/\text{nm}$  ( $\epsilon/\text{cm}^{-1}\text{mol}^{-1}\text{dm}^3$ )): 253.5 (103000). UV–Vis (solid, nujol, nm): 257. Emission (solid, 299 K,  $\lambda_{\text{max}}/\text{nm}$ ): 329, 649 (ex. 280 nm).

#### **[Ag( $\mu$ -4-Br-3,5-Ph<sub>2</sub>pz)]<sub>3</sub> ([Ag(L5Br)]<sup>4</sup>)**

This complex was prepared by a procedure analogous to that used for [Ag(L5H)], substituting NaL5Br (198 mg, 0.617 mmol). Colorless crystals (102.8 mg, 0.0422 mmol, yield 41%) were isolated from dichloromethane at  $-15$  °C. IR (KBr,  $\text{cm}^{-1}$ ): 3063m (C–H, aromatic), 3023m (C–H, aromatic), 2963w, 1948w, 1876w, 1802w, 1750w, 1603m, 1577w, 1462s (C=N), 1435m, 1319w, 1294w, 1262m, 1179w, 1137s, 1072m, 1030m, 992m, 980m, 911m, 840w, 805w, 765vs, 733m, 695vs, 596m, 547w, 486w, 459m, 429w, 409w. Far-IR (CsI,  $\text{cm}^{-1}$ ): 669w, 618m, 597vs, 549s (C–Br), 499w, 488s (Ag–N), 460s, 432m, 406w, 387w, 331w, 316w, 284w, 254s, 231w, 205s, 163w, 153w. Raman (solid,  $\text{cm}^{-1}$ ): 3066m (C–H, aromatic), 2986w, 1605vs, 1577w, 1553w, 1518s, 1465w (C=N), 1437s, 1402m, 1322w, 1296w, 1274w, 1181w, 1158w, 1034w, 1003s, 982m, 843w, 767w, 703w, 670m, 619w, 546w (C–Br), 488w (Ag–N), 408w, 331w, 253m, 241w, 221w, 202w.  $^{13}\text{C}$ -NMR ( $\text{CDCl}_3$ , 125 MHz):  $\delta$  128.2 (*o*-Ph), 128.9 (*m*-Ph). UV–Vis (solution,  $\text{CH}_2\text{Cl}_2$ ,  $\lambda_{\text{max}}/\text{nm}$  ( $\epsilon/\text{cm}^{-1}\text{mol}^{-1}\text{dm}^3$ )): 242 (86000). UV–Vis (solid, nujol, nm): 252.5. Emission (solid, 299 K,  $\lambda_{\text{max}}/\text{nm}$ ): 326.5, 449, 647 (ex. 280 nm).

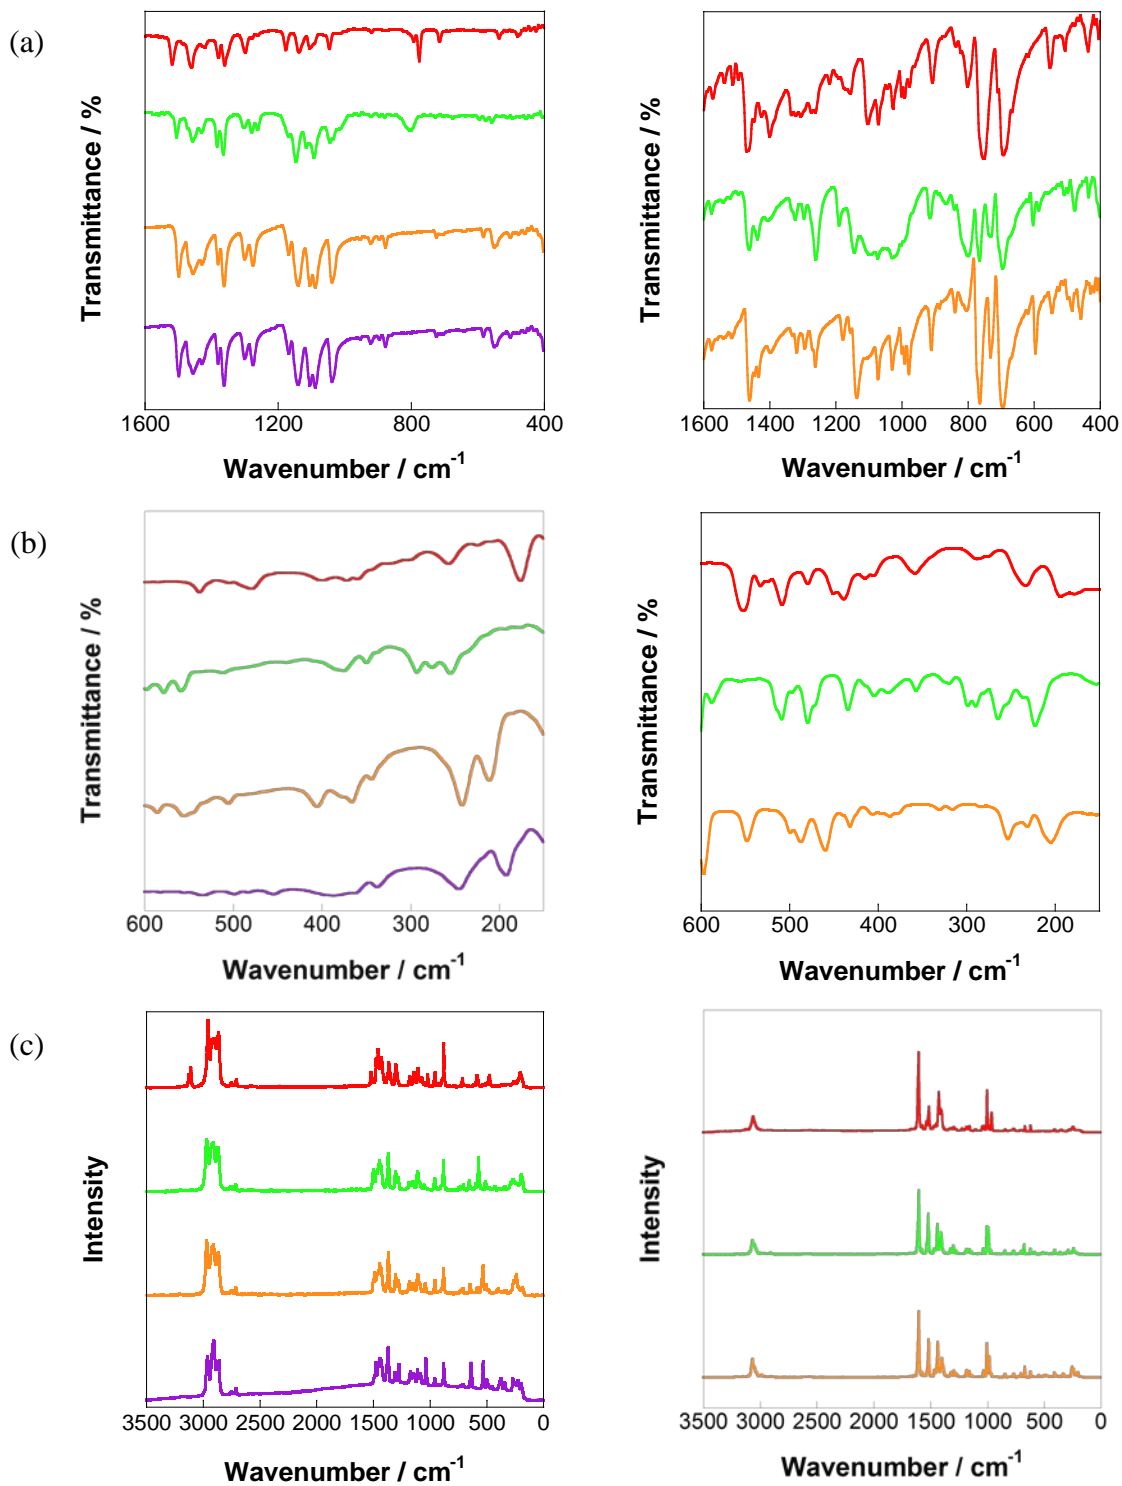

**Fig. S1** IR, far-IR, Raman spectra (left: **L1** complexes, right: **L5** complexes; (a) IR, (b) far-IR, (c) Raman; red: H, green: Cl, orange: Br, purple: I).

**Table S2**

Emission wavelengths (nm) at variable temperatures and 280 nm irradiation.

|                               |       |                                                             |
|-------------------------------|-------|-------------------------------------------------------------|
| <b>[Ag(L1H)]<sub>2</sub></b>  | 299 K | 315.5, 493, 626.5                                           |
|                               | 173 K | 314.5, 507, 623                                             |
|                               | 83 K  | 315, 329, 344.5, 361, 379, 397.5, 417, 620, 657, 687, 719.5 |
| <b>[Ag(L1Cl)]<sub>2</sub></b> | 299 K | 312, 373.5, 620, 721                                        |
|                               | 173 K | 313, 365, 620.5, 705                                        |
|                               | 83 K  | 310.5, 358.5, 469.5, 618.5, 693.5                           |
| <b>[Ag(L1Br)]<sub>2</sub></b> | 299 K | 312, 379, 620                                               |
|                               | 173 K | 313.5, 371, 469, 620.5, 723                                 |
|                               | 83 K  | 313, 362.5, 479, 618.5, 712.5                               |
| <b>[Ag(L1I)]<sub>n</sub></b>  | 299 K | 314, 363.5, 621, 700                                        |
|                               | 173 K | 313.5, 358, 620, 688                                        |
|                               | 83 K  | 313, 354, 481, 535, 616.5, 682                              |
| <b>[Ag(L5H)]<sub>2</sub></b>  | 299 K | 329, 649                                                    |
|                               | 173 K | 323.5, 442, 449.5, 469.5, 639                               |
|                               | 83 K  | 322.5, 423.5, 450, 470.5, 633                               |
| <b>[Ag(L5Cl)]</b>             | 299 K | 320.5, 634.5                                                |
|                               | 173 K | 315, 455, 475, 626                                          |
|                               | 83 K  | 315, 427.5, 454, 474, 623.5                                 |
| <b>[Ag(L5Br)]</b>             | 299 K | 326.5, 449, 647                                             |
|                               | 173 K | 319, 427, 455, 478.5, 631.5                                 |
|                               | 83 K  | 320, 427.5, 454.5, 483, 624                                 |

## References

- 1 H. V. R. Dias, H. V. K. Diyabalanage, *Polyhedron*, 2006, **25**, 1655–1661.
- 2 H. H. Murray, R. G. Raptis, J. P. Fackler Jr., *Inorg. Chem.*, 1988, **27**, 26–33.
- 3 A. A. Mohamed, L. M. Pérez, J. P. Fackler Jr., *Inorg. Chim. Acta*, 2005, **358**, 1657–1662.
- 4 G. Yang, P. Baran, A.R. Martínez, R. G. Raptis, *Cryst. Growth Des.*, 2013, **13**, 264–269.
